# Supplementary material for: Cellulose nanocrystals as host matrix and waveguide materials for recyclable luminescent solar concentrators
Source: Royal Society of Chemistry journal article supplement (doi:10.1039/c7ra04344a), 2017-01-01
Supplement: c7ra04344a1.pdf [file c7ra04344a1.pdf]

## Electronic Supplementary Information

### Cellulose nanocrystals as host matrix and waveguide materials for recyclable luminescent solar concentrators

Farsad Imtiaz Chowdhury,<sup>a</sup> Carson Dick,<sup>a</sup> Lingju Meng,<sup>a</sup> Seyed Milad Mahpeykar,<sup>a</sup> Behzad Ahvazi<sup>b</sup> and Xihua Wang<sup>\*a</sup>

*a. Department of Electrical and Computer Engineering, University of Alberta, Edmonton, T6G 2V4. Email: xihua@ualberta.ca*

*b. Biomass Processing & Conversion-BioResources, Alberta Innovates Technology Future, Edmonton, T6N 1E4.*

*\*Corresponding author: Prof. Xihua Wang*

## Calculation of optical efficiency

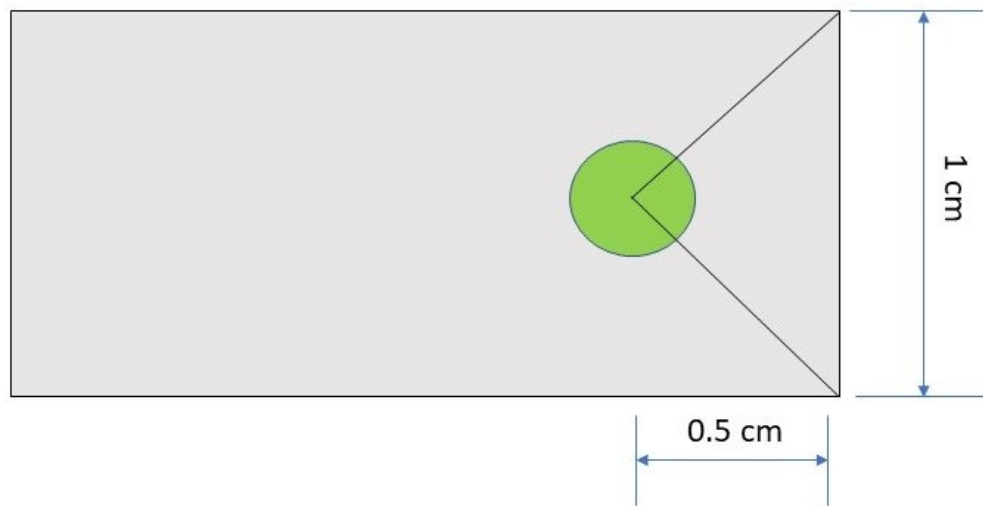

**Fig. S1.** A Schematic showing the collection angle of photons.

In the experiment, we extracted the photons from only one edge of the sample. This edge from which we extracted the photons has a dimension of 1 cm and when we shine light on our sample and focus on a point which is 0.5 cm away from this edge, emitted photons with a collection angle 90 degree or lower get detected by the detector.

$$\tan \Theta = 0.5/0.5$$

$$\Theta = 45^\circ \text{ and hence } 2 \Theta = 90^\circ.$$

Assuming we have an isotropic emission, the optical efficiency values at 0.5 cm were multiplied by 4 and to maintain consistency, rest of the values were also multiplied by 4 which we deem as the maximum optical efficiency that can be achieved by extracting photons from four side edges of the sample.

## Transmission and reflection data of un-doped CNC and APE samples

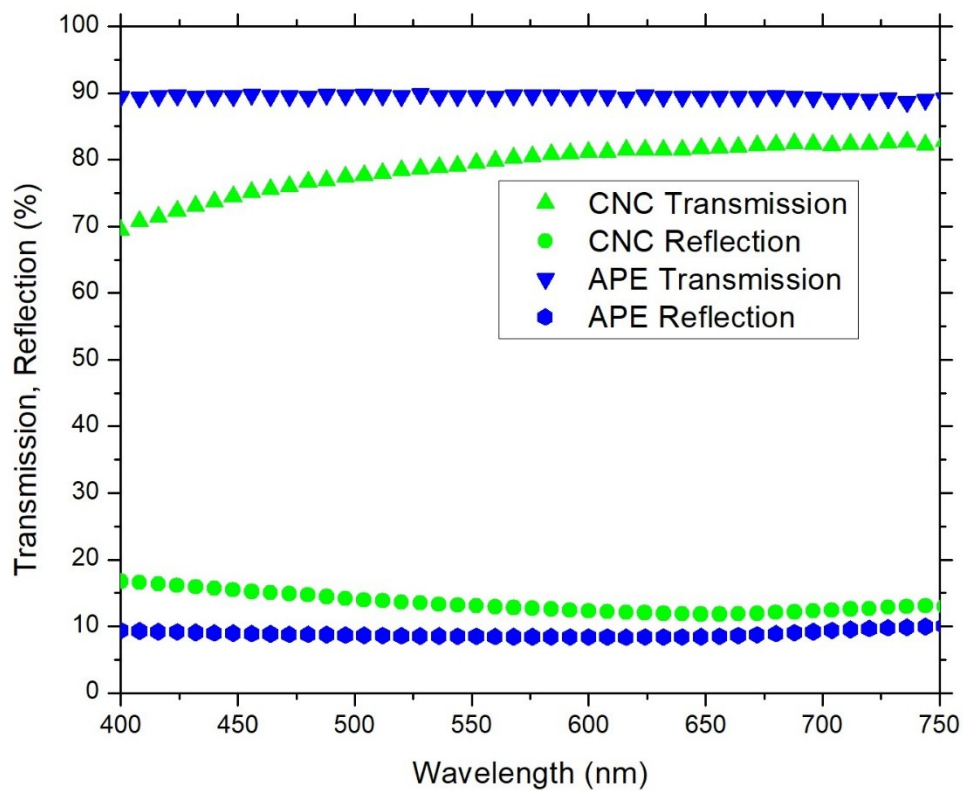

**Fig. S2.** Transmission and reflection data of un-doped CNC and APE samples.

Fig. S2 shows the transmission and reflection data of CNC and APE samples without the presence of dyes.
